# Supplementary material for: Development of genomic simple sequence repeat markers for Glycyrrhiza lepidota and cross-amplification of other Glycyrrhiza species
Source: PeerJ. 2019 Aug 7;7:e7479. doi: 10.7717/peerj.7479 (PMC6689217; doi:10.7717/peerj.7479)
Supplement: Table S1 [file peerj-07-7479-s001.xlsx]

## Sheet: Table S1
Table S1. The distributions of SSRs identiﬁed from the Glycyrrhiza lepidota
bp type	Repeated motif	Repeated number																							Total
		3	4	5	6	7	8	9	10	11	12	13	14	15	16	17	18	19	20	21	22	23	25	>25
Mono-nucleotide	A				83596	69713	18835	9841	8846	5479	4315	2542	1952	1246	1214	1647	345	6	1						209578
	G				2371	1790	761	357	957	794	357	378	503	216	139	72	40	5	2						8742
	Sub-total																								218320
Di-nucleotide	AC			329	167	112	64	35	23	19	6	5	2	3	1			2							768
	AG			475	164	112	83	82	50	27	25	13	7	7	5	3	1					1			1055
	AT			1234	382	211	171	109	63	43	19	7	2	2	4	1		2							2250
	CA			363	129	64	44	21	20	9	7	3	2	2	1		1								666
	CG			13		1																			14
	CT			365	117	93	61	47	36	28	9	17	8	8	4	1	1	2	1	1	1				800
	GA			399	126	78	75	45	32	22	14	11	4	5	3	2	1	1							818
	GC			10	5		3																		18
	GT			213	97	51	35	21	15	8	3	5	2	1			1								452
	TA			1248	345	213	152	87	54	27	12	6	4	5	1										2154
	TC			538	165	106	85	58	39	35	20	15	21	6	2	1	1		2	1					1095
	TG			470	195	104	70	52	37	18	7	8		1	3	1									966
	Sub-total			5657	1892	1145	843	557	369	236	122	90	52	40	24	9	6	7	3	2	1	1	0	0	11056
Tri-nucleotide	AAC		122	46	20	12	11	4																	215
	AAG		134	35	22	7	8	4	1	2	1		1			1									216
	AAT		292	104	51	17	13	6	5	2	1	2			1	2					1	1			498
	ACA		101	31	19	8	4	1	2																166
	ACC		59	15	3		1																		78
	ACG		11	1																					12
	ACT		27	5	1			1																	34
	AGA		118	35	19	9	7	4		1	2	2	1												198
	AGC		54	14	6	1	1																		76
	AGG		41	17	4	2																			64
	AGT		34	5	4	1		2																	46
	ATA		152	73	30	15	4	1	7	1	1	2	2	1			1	1	1						292
	ATC		106	31	11	5	6		1																160
	ATG		89	34	11	8	2	2																	146
	ATT		241	84	33	23	12	4	3	3	6	1			1	1				1				1	414
	CAA		118	55	21	2	4	1			2	2													205
	CAC		74	22	9	2	1																		108
	CAG		49	18	4	4																			75
	CAT		102	29	10	1	2	2																	146
	CCA		90	17	13	1			1																122
	CCG		17	2	1																				20
	CCT		44	11	4	1																			60
	CGA		16	2																					18
	CGC		21	2	1																				24
	CGG		27	4	1																				32
	CGT		11	3																					14
	CTA		27	7	3		1																		38
	CTC		70	25	5	1	1	1																	103
	CTG		47	4	6			1																	58
	CTT		116	30	22	11	7	2	1	1		1				2									193
	GAA		121	51	29	10	5	3		1				1											221
	GAC		17	6	1		1																		25
	GAG		63	16	4	2	2	1																	88
	GAT		105	27	7	5	2	2																	148
	GCA		56	9	9	2																			76
	GCC		16	1		1																			18
	GCG		15	5	1	1																			22
	GCT		32	12		3	1																		48
	GGA		64	9	7	2																			82
	GGC		23	8	2																				33
	GGT		63	25	12		1																		101
	GTA		22	6	3				1																32
	GTC		18	1																					19
	GTG		55	14	4	1																			74
	GTT		99	45	13	7	2		3																169
	TAA		158	39	30	18	9	3	4		3			1											265
	TAC		21	19	5	1	2	1																	49
	TAG		35	3	2	1		1		1															43
	TAT		143	56	49	17	11	1	1	2	1	2			1	2	1			1			1		289
	TCA		91	37	13	4	2	1		1															149
	TCC		65	20	5	3			1																94
	TCG		21	1	2		1																		25
	TCT		114	31	17	15	4	4	3	4	1	1					1	1							196
	TGA		115	33	8	7	3	2	1																169
	TGC		78	24	6	4	1	1																	114
	TGG		103	22	9	5	1	1																	141
	TGT		107	48	16	3	2	2																	178
	TTA		171	61	43	12	9	3	3	2	3		2	1											310
	TTC		185	53	23	21	6	2		1	3		1			1									296
	TTG		170	62	27	9	5	1		1															275
	Sub-total		4756	1505	681	285	155	65	38	23	24	13	7	4	3	9	3	2	1	2	1	1	1	1	7580
Tetra-nucleotide	AAAC	118	14	1	1																				134
	AAAG	166	22	9		1	1																		199
	AAAT	503	63	19	7	1																			593
	AACA	65	5	3	1																				74
	AACC	14	4																						18
	AACG	3		1																					4
	AACT	26	1	1																					28
	AAGA	87	13	2	2																				104
	AAGC	16	2																						18
	AAGG	25	2	1																					28
	AAGT	4																							4
	AATA	240	30	15	6	4																			295
	AATC	44	5	1																					50
	AATG	43	6	1																					50
	AATT	278	32	10	1	1	1																		323
	ACAA	48	4	2																					54
	ACAC		1																						1
	ACAG	5																							5
	ACAT	43	3	4			2				2														54
	ACCA	13																							13
	ACCC	4																							4
	ACCT	6																							6
	ACGA	1	2																						3
	ACGC	1																							1
	ACGT	6																							6
	ACTA	16	2																						18
	ACTC	21	2																						23
	ACTG	2																							2
	AGAA	127	11	3		1	1																		143
	AGAC	9	1	1																					11
	AGAG	1																							1
	AGAT	40	2			3																			45
	AGCA	8		1																					9
	AGCC	6																							6
	AGCT	61	8	3	1																				73
	AGGA	11			1																				12
	AGGC	3	1																						4
	AGGG	13		1																					14
	AGGT	8																							8
	AGTA	3																							3
	AGTC	3																							3
	AGTG	23	5	2																					30
	AGTT	33	2	1																					36
	ATAA	226	31	9	1	1																			268
	ATAC	38	8	4	2			1	1																54
	ATAG	71	6	9	2	1						1													90
	ATAT	3	3																						6
	ATCA	54	8	1																					63
	ATCC	10	3																						13
	ATCG	4																							4
	ATCT	38	3	2	2																				45
	ATGA	48	11	3	1																				63
	ATGC	26	3																						29
	ATGG	16	2																						18
	ATGT	36	4	2					1																43
	ATTA	305	53	8	9		1																		376
	ATTC	49	9	2	2																				62
	ATTG	98	12	1																					111
	ATTT	341	54	13	1																				409
	CAAA	69	6	3																					78
	CAAC	11	1																						12
	CAAG	10																							10
	CAAT	41	6																						47
	CACA	1																							1
	CACC	14	2																						16
	CACG	6	2																						8
	CACT	13	3	2																					18
	CAGA	6																							6
	CAGC	5																							5
	CAGG	1																							1
	CAGT	3																							3
	CATA	31	4	1	1	1					1			1											40
	CATC	14	2	1	1																				18
	CATG	47	3																						50
	CATT	45	2	1	1																				49
	CCAA	20		1																					21
	CCAC	9	2																						11
	CCAG	1																							1
	CCAT	15	1																						16
	CCCA	6																							6
	CCCT	16	4																						20
	CCGT	1																							1
	CCTA	3																							3
	CCTC	7		1																					8
	CCTT	18																							18
	CGAA	1																							1
	CGAG	3	1																						4
	CGAT	3		1																					4
	CGCA	2																							2
	CGCT	1		1																					2
	CGGG	1																							1
	CGTA	1																							1
	CGTC	2																							2
	CGTG	2				1																			3
	CGTT	1	1																						2
	CTAA	19	5	1																					25
	CTAC	2																							2
	CTAG	73	10	3	2																				88
	CTAT	15	5		2		1	2																	25
	CTCA	15	3	1		1					1														21
	CTCC	25	5																						30
	CTCG	1																							1
	CTGA	4																							4
	CTGC	3																							3
	CTGG	2																							2
	CTGT	4																							4
	CTTA	6																							6
	CTTC	28	3		1																				32
	CTTG	20																							20
	CTTT	59	10	4	1																				74
	GAAA	104	8	3																					115
	GAAC	2	1																						3
	GAAG	25	2	1																					28
	GAAT	28	5	1	2																				36
	GACA	9																							9
	GACG	2																							2
	GACT	3																							3
	GAGA	1																							1
	GAGC	4	1																						5
	GAGG	15	5	1																					21
	GAGT	31	6				1																		38
	GATA	19	1	3		1																			24
	GATC	4	5																						9
	GATG	15	1				1																		17
	GATT	25	2	1	1																				29
	GCAA	9	1																						10
	GCAC	3	4																						7
	GCAG	3																							3
	GCAT	20	2	1																					23
	GCCA	5																							5
	GCCC	2																							2
	GCCT	4																							4
	GCGA	1																							1
	GCGT	1																							1
	GCTA	38	4	3																					45
	GCTC	1																							1
	GCTG	5																							5
	GCTT	8																							8
	GGAA	30	1																						31
	GGAG	12	1	1	1																				15
	GGAT	10	1	1																					12
	GGCA	3																							3
	GGCG	1																							1
	GGCT	2	1	1																					4
	GGGA	17																							17
	GGGT	2																							2
	GGTA	2		1																					3
	GGTG	8																							8
	GGTT	17	2	1																					20
	GTAA	6																							6
	GTAC	10																							10
	GTAG	4																							4
	GTAT	25	6		2		1		1																35
	GTCA	2																							2
	GTCT	5																							5
	GTGA	15	3	1																					19
	GTGC	6																							6
	GTGG	11																							11
	GTTA	23	5	2	1		1																		32
	GTTC	2																							2
	GTTG	12	2																						14
	GTTT	55	3	1																					59
	TAAA	210	25	2	2																				239
	TAAC	21	7	2	1	1																			32
	TAAG	1																							1
	TAAT	267	34	7	2																				310
	TACA	25	7	3																					35
	TACC	8																							8
	TACG	4																							4
	TACT	2																							2
	TAGA	18	2																						20
	TAGC	47	2																						49
	TAGG	3																							3
	TAGT	25	5			1																			31
	TATA	2		1																					3
	TATC	42	12			1																			55
	TATG	63	9	2	3	3			1																81
	TATT	247	32	12	2		1																		294
	TCAA	39	2																						41
	TCAC	30	6	1																					37
	TCAG	1	1																						2
	TCAT	33	10	1																					44
	TCCA	17																							17
	TCCC	14	1																						15
	TCCT	11	3																						14
	TCGA	1																							1
	TCGC	1	1																						2
	TCGT	3																							3
	TCTA	33	5		1	1																			40
	TCTC	5																							5
	TCTG	9																							9
	TCTT	81	9	1	2	1	1																		95
	TGAA	48	2	1																					51
	TGAC	2																							2
	TGAG	25	1	1																					27
	TGAT	37	12																						49
	TGCA	24	5																						29
	TGCC	2																							2
	TGCT	17	2																						19
	TGGA	11	4																						15
	TGGC	3	1																						4
	TGGG	14																							14
	TGGT	16	2		1																				19
	TGTA	35	7	1	2		1																		46
	TGTC	6																							6
	TGTG	1																							1
	TGTT	55	6	5																					66
	TTAA	255	24	8	1	3																			291
	TTAC	3																							3
	TTAG	20	1		2																				23
	TTAT	243	43	6	5	1																			298
	TTCA	50	8					1																	59
	TTCC	26	2	2																					30
	TTCG	5																							5
	TTCT	89	12	1	1																				103
	TTGA	45	3																						48
	TTGC	26	3	2																					31
	TTGG	11	2																						13
	TTGT	61	5	2																					68
	TTTA	340	66	11	4	1	1				1														424
	TTTC	194	26	7	3																				230
	TTTG	116	8	4	3																				131
	Sub-total	7926	1025	263	91	30	15	4	4	0	5	1	0	1	0	0	0	0	0	0	0	0	0	0	9365
Penta-nucleotide	AAAAT	201	38	29	10	6	1		1																286
	AAAAG	43	17	5		6	5	1			1		1												79
	AAAAC	16	11	8	7			1																	43
	AAATA	44	28	24	10	3	3			1				1											114
	AAATT	35	17		3	2																			57
	AAATG	9																							9
	AAATC	5	2		2	3	2		1	1	1		1		1										19
	AAAGA	17	5	4	2		2	1		1															32
	AAAGG	6	4																						10
	AAAGC	2	1																						3
	AAACA	16	5		3		1	1																	26
	AAACT	2	1																						3
	AAACG	2																							2
	AAACC	10																							10
	AATAA	45	22	11	8																				86
	AATAT	19	13	5	3	1		1																	42
	AATAG	5	1	1																					7
	AATAC	1	1																						2
	AATTA	26	13	2	1		1																		43
	AATTG	8	2	1	2																				13
	AATTC	10	2	1	1																				14
	AATGA	5	1	1	1		1																		9
	AATGT	3	1	1																					5
	AATGG	1	1		1																				3
	AATGC	5		1	1	1																			8
	AATCA	8	3	1	1	1	1																		15
	AATCT	4	1	1																					6
	AATCG	1																							1
	AATCC	5	3	1	1																				10
	AAGAA	16	5	4	1	2	1	1																	30
	AAGAT	3		1	1																				5
	AAGAG	7	4	3	2	2	1	1																	20
	AAGAC	1	1		1																				3
	AAGTT	1																							1
	AAGTG	1	1	1	1																				4
	AAGGA	2	1		1	1	1																		6
	AAGGT		1																						1
	AAGGG	3	2	1	1	1	1		1																10
	AAGCA	2		1	1	1																			5
	AAGCT	1		1																					2
	AACAA	11	4	1	2	1	3	1		1		1													25
	AACAT	4	2	1		1																			8
	AACAG	4	4																						8
	AACAC	2	2		2																				6
	AACTA	1		2		1																			4
	AACTG	1																							1
	AACTC		1		1	1																			3
	AACGA			1																					1
	AACCA	6	7	2		2	1	1																	19
	AACCT		1		1																				2
	AACCG	1	1	1		1																			4
	AACCC	4	2	1	1	1		1																	10
	ATAAA	76	21	7		1																			105
	ATAAT	13	8	6	4	5	2	1	1																40
	ATAAG	5	4	1	1																				11
	ATAAC	3	1	1																					5
	ATATA	21	17	9	4	5	1	1																	58
	ATATG	9	5	6	1																				21
	ATATC	5	1	1	1																				8
	ATAGA	7	6	3	2		1																		19
	ATAGT	5		1	1	2																			9
	ATAGG	1		1																					2
	ATAGC			1																					1
	ATACA	3		1	1	1																			6
	ATACT		1	1																					2
	ATACG		1																						1
	ATTAA	9	7	10	8	2	4	1																	41
	ATTAG	4	1	2	6	1	1																		15
	ATTAC	3	2																						5
	ATTTA	29	5	7	3	1																			45
	ATTTG	9	6	5	6																				26
	ATTTC	7	1		2	2	1	1																	14
	ATTGA	11	2	1	1																				15
	ATTGT	2	1	1	1																				5
	ATTGG	4	7	2	1	1																			15
	ATTGC	2	1		1																				4
	ATTCA	17	3																						20
	ATTCT	6	8		1																				15
	ATTCG	1	1	1																					3
	ATTCC	4	1	1																					6
	ATGAA	49	3																						52
	ATGAT	13	6	1	1																				21
	ATGAG	5	1	1																					7
	ATGAC	2																							2
	ATGTA	4	2	3	2	1																			12
	ATGTG	4	1		1	1	1																		8
	ATGGA	5	3	1	1																				10
	ATGGT		1																						1
	ATGGG	2	3	1																					6
	ATGGC			1																					1
	ATGCA	9	1																						10
	ATGCG	1																							1
	ATGCC	2	1	1																					4
	ATCAA	9	2	1																					12
	ATCAG	1		1																					2
	ATCAC	2	2	1																					5
	ATCTA	9	5	1	4																				19
	ATCTG	2	1		1																				4
	ATCTC	1	1	1																					3
	ATCGG	1																							1
	ATCCA	10	1	2																					13
	ATCCT	2	2	1																					5
	ATCCC	2	1																						3
	AGAAA	24	8	6	2																				40
	AGAAG	4	2	1	2	1																			10
	AGAAC	4	2	1		1																			8
	AGATA	1		1																					2
	AGATG	1	1	1	1																				4
	AGATC	2																							2
	AGAGA	10	8	5	2	1	1																		27
	AGAGT	1	1																						2
	AGAGG	5	1																						6
	AGACT	1																							1
	AGTAA	1																							1
	AGTAG	2																							2
	AGTTG	1	2																						3
	AGTTC	2	1																						3
	AGTGA	2	2	1																					5
	AGTGT	1	1																						2
	AGTGG	2																							2
	AGTGC	1																							1
	AGTCA	1																							1
	AGTCC	1																							1
	AGGAA	2	1	1																					4
	AGGTC	2																							2
	AGGGA	3	1																						4
	AGGGT	1																							1
	AGGGG	2	1	1	1																				5
	AGGCT	2																							2
	AGCAA	4	2	1	1																				8
	AGCAC	1																							1
	AGCTA	2																							2
	AGCTG	1																							1
	AGCCA	2																							2
	AGCCG	1																							1
	AGCCC	2																							2
	ACAAA	10	8	3	1																				22
	ACAAG	1																							1
	ACAAC	5	4																						9
	ACATA	2	1																						3
	ACATG	3																							3
	ACATC	2	2																						4
	ACAGA	6	3	1																					10
	ACAGT	3																							3
	ACAGC	3																							3
	ACACA	20	2	1	1																				24
	ACACG	1																							1
	ACACC	4																							4
	ACTAA	2																							2
	ACTAG	1																							1
	ACTAC	1																							1
	ACTTG	1																							1
	ACTTC	3																							3
	ACTGA	5																							5
	ACTGG	1																							1
	ACTGC	1																							1
	ACTCG	1																							1
	ACTCC	1																							1
	ACGAA	3																							3
	ACGTC	1																							1
	ACGCA	2																							2
	ACCAA	8	1																						9
	ACCAG	1																							1
	ACCAC	3																							3
	ACCTG	1																							1
	ACCTC	1																							1
	ACCGG	3																							3
	ACCCA	6	2	1																					9
	ACCCG	2	1																						3
	ACCCC	1	1	1																					3
	TAAAA	89	22	17	5																				133
	TAAAG	2																							2
	TAAAC	3																							3
	TAATA	38	2	1																					41
	TAATG	1	1	2	1																				5
	TAATC	4	1																						5
	TAAGA	2	1																						3
	TAACA	2																							2
	TAACG	1																							1
	TAACC	1																							1
	TATAA	15	4	1																					20
	TATAG	4	2																						6
	TATAC	10	1		1																				12
	TATTC	5																							5
	TATGA	6		1		1	1																		9
	TATGG	2			1																				3
	TATGC	1		1																					2
	TATCA	3	3	5	2																				13
	TATCC	1		1																					2
	TAGAA	4		1			1																		6
	TAGAG	1			1																				2
	TAGTA	2	2																						4
	TAGTG	2																							2
	TAGGA	1		1																					2
	TAGCA	2																							2
	TACAA	4		1		1																			6
	TACAG	2																							2
	TACAC			1																					1
	TACTG	1																							1
	TACTC	1																							1
	TACGA		2																						2
	TACGC	1	1																						2
	TACCC			2																					2
	TTAAA	14	10	5	3	1	1																		34
	TTATG	5		1																					6
	TTATC	3	1																						4
	TTAGA	2	2		1																				5
	TTAGG			1																					1
	TTAGC	4		1		1	1																		7
	TTACA	2		3																					5
	TTACC			1																					1
	TTTAG	1		1																					2
	TTTTG	38	15	2	1	1																			57
	TTTTC	37	19	10	9	3																			78
	TTTGA	8	1	1																					10
	TTTGG	5	3		2																				10
	TTTGC	1	1	1																					3
	TTTCA	11	5	3																					19
	TTTCC	5	4	2																					11
	TTGAA	16	2	2																					20
	TTGAG	1	1	2																					4
	TTGAC	1	1																						2
	TTGTG	4	2	1																					7
	TTGGA	2	2	3	1																				8
	TTGGG	8	1																						9
	TTGCA	4	2	3																					9
	TTGCC	1	2																						3
	TTCAG	3																							3
	TTCAC	2	1																						3
	TTCTG	3																							3
	TTCTC	9	1	1																					11
	TTCGG	2																							2
	TTCGC	2																							2
	TTCCA	4	1	1																					6
	TTCCG	2																							2
	TTCCC	3																							3
	TGAAG	3																							3
	TGAAC	3																							3
	TGATG	4																							4
	TGATC	2																							2
	TGAGA	2	1	1	1																				5
	TGAGG	1																							1
	TGAGC	2																							2
	TGACA	1	2																						3
	TGTAG	1	1	1																					3
	TGTAC	1																							1
	TGTTG	5	4	1	1																				11
	TGTTC	6	2	2	1	1																			12
	TGTGA	2	1	2	2																				7
	TGTGG	1																							1
	TGTGC	4																							4
	TGTCC	1																							1
	TGGAG	2																							2
	TGGTG	4	1	3	2																				10
	TGGTC	1																							1
	TGGGA	1	1	1																					3
	TGGGG	1	2	2																					5
	TGGGC	2																							2
	TGGCA	2																							2
	TGGCC	2																							2
	TGCAG	1	2	1																					4
	TGCAC	1																							1
	TGCTG	1																							1
	TGCTC	2																							2
	TGCGG		1																						1
	TCAAG	1																							1
	TCAAC	1	1																						2
	TCATG	1	2	1																					4
	TCATC		1	1																					2
	TCAGC		1																						1
	TCACC	1		1																					2
	TCTAG	2	2	1																					5
	TCTAC	1	2	1																					4
	TCTTG	1	1	1																					3
	TCTTC	3	2	2	2	1																			10
	TCTGG	2																							2
	TCTGC	1																							1
	TCTCG	1																							1
	TCTCC	2	2	1	1																				6
	TCGTG	1																							1
	TCGGA	2																							2
	TCGGG	1																							1
	TCGGC	1																							1
	TCGCC	1																							1
	TCCAC	7																							7
	TCCTG	1																							1
	TCCTC	4																							4
	TCCCC	4																							4
	GAAAG	3	2	4	2																				11
	GAAAC	1																							1
	GAATG	5	5	1	1																				12
	GAATC	2		2	1																				5
	GAAGG	1	1	1																					3
	GAAGC	1																							1
	GAACC	1	1	1	1																				4
	GATAG	1																							1
	GATAC	1																							1
	GATTG	6	3	2		1																			12
	GATGG	2																							2
	GATCG	2																							2
	GATCC		1																						1
	GAGAG	2	2	1																					5
	GAGTG			1																					1
	GAGGG	5	2	1	1	2																			11
	GAGCC	2																							2
	GACTG	2																							2
	GACCC	1																							1
	GTATG	1	1																						2
	GTTTG	7	2	1	2	1																			13
	GTTGG	5	2	2	1																				10
	GTTGC	1																							1
	GTTCG	1																							1
	GTTCC	2																							2
	GTGAG	1																							1
	GTGTG	5																							5
	GTGGG	2																							2
	GTGGC	1																							1
	GTGCC	1																							1
	GGAAG	3																							3
	GGATG	2																							2
	GGAGG	6	3	1																					10
	GGACC		1																						1
	GGTTG	1	1	2																					4
	GGTGG		1																						1
	GGTCG		1																						1
	GGGAG	1	1																						2
	GGGTG	1	1																						2
	GGGGC		1																						1
	GGGCC	1	1																						2
	GGCAG	1		1																					2
	GGCTG	1	1																						2
	GGCGG	2																							2
	GCAGG	2																							2
	GCTAG	2																							2
	GCTTG	1																							1
	GCTGG	2																							2
	GCTCG	2																							2
	GCGAG	1																							1
	CAAAG	3																							3
	CAATG	2																							2
	CAAGG	3																							3
	CATAG	4																							4
	CATGG	5																							5
	CAGAG	3																							3
	CAGTG	2																							2
	CAGGG	1																							1
	CACAG	2																							2
	CACCG	1																							1
	CTAGG	2																							2
	CTTGG	3																							3
	CTGGG	1																							1
	CTCGG	1																							1
	CCAGG	2																							2
	Sub-total	1858	624	354	186	78	41	14	4	4	2	1	2	1	1	0	0	0	0	0	0	0	0	0	3170
Hexa-nucleotide	AAAAAT	28	11	5	3	2																			49
	AAAAAG	8	1	1	1																				11
	AAAAAC	7	2	3	3	1	1																		17
	AAAATA	9	11	5	2																				27
	AAAATT	5	2	3	1																				11
	AAAATG	1		1	1																				3
	AAAATC	2																							2
	AAAAGA	3	1																						4
	AAAAGT	1																							1
	AAAAGG	2	1																						3
	AAAAGC	1	1																						2
	AAAACA	2	2	1	1																				6
	AAAACC			1																					1
	AAATAA	3	3	2	5																				13
	AAATAT	2	2	1	1																				6
	AAATAC			1		1																			2
	AAATTA		1	1	2																				4
	AAATTT	2	1	1																					4
	AAATTC	1	2																						3
	AAATGA	2																							2
	AAATGT	1																							1
	AAATGG	2																							2
	AAATGC	1																							1
	AAATCA	2																							2
	AAATCC		2	1																					3
	AAAGAA	3	2	1																					6
	AAAGAT		1																						1
	AAAGTA	1																							1
	AAAGGG	1																							1
	AAAGGC		1																						1
	AAAGCA	1	1	1																					3
	AAAGCC	1																							1
	AAACAA	5		1																					6
	AAACAC		1	1																					2
	AAACTG	1																							1
	AAACTC	1																							1
	AAACGG	1																							1
	AAACCA	2																							2
	AAACCC	1																							1
	AATAAA	6	1	3	1																				11
	AATAAT		1																						1
	AATAAG	2	1																						3
	AATAAC	1																							1
	AATATA	6	2		1																				9
	AATATT	1		1																					2
	AATATG	2																							2
	AATATC	1																							1
	AATAGA	1																							1
	AATAGT	1																							1
	AATAGG	1																							1
	AATACA	1	1																						2
	AATACT	1																							1
	AATACC	1																							1
	AATTAA	2	4	1	1																				8
	AATTAT	6	2																						8
	AATTAG	1	1																						2
	AATTAC	2																							2
	AATTTA	2	3																						5
	AATTTG	1																							1
	AATTTC	1	1																						2
	AATTGA	3	1																						4
	AATTGG	1																							1
	AATTGC	2		1																					3
	AATTCA		1	1																					2
	AATTCT		1	2																					3
	AATTCC	1	1	1																					3
	AATGAA	1																							1
	AATGAT		1																						1
	AATGAG			1																					1
	AATGTT	1																							1
	AATGTG	1																							1
	AATGGT	1																							1
	AATGGG	2																							2
	AATCAA	2																							2
	AATCAT	1																							1
	AATCAG	1	1	1																					3
	AATCAC	1			1																				2
	AATCTA	1	2		1																				4
	AATCTT	1		1	1																				3
	AATCTG		1																						1
	AATCCT	1																							1
	AATCCC		1																						1
	AAGAAA	1	1																						2
	AAGAAT			1																					1
	AAGATA				1																				1
	AAGATC				1																				1
	AAGAGA	3		1																					4
	AAGAGG	4																							4
	AAGTTG	1																							1
	AAGTGG	1																							1
	AAGGAA	2	1		1																				4
	AAGGAT		1																						1
	AAGGAG	1		2																					3
	AAGGTA		1																						1
	AAGGGA		1																						1
	AAGGGG	3																							3
	AAGGCG	1																							1
	AAGCAA	1																							1
	AAGCAT	1																							1
	AAGCAG	1																							1
	AAGCTG	1																							1
	AAGCCC		1	1	1																				3
	AACAAA	4	2	1	2																				9
	AACAAT	2	1																						3
	AACATA	1																							1
	AACATG	2																							2
	AACAGA	1	1		1																				3
	AACAGT	1																							1
	AACAGG	1																							1
	AACACA	3		1																					4
	AACACT	1																							1
	AACACC	1																							1
	AACTAT	3																							3
	AACTAC	1																							1
	AACTGC	1																							1
	AACTCA	1																							1
	AACCAA	2																							2
	AACCAC	1																							1
	AACCCA	1																							1
	AACCCC	2																							2
	ATAAAA	15	2		3																				20
	ATAAAT	6	1	1	1																				9
	ATAAAG			1																					1
	ATAAAC		2	1																					3
	ATAATC	1		1																					2
	ATAAGA	1																							1
	ATAAGT	1																							1
	ATAAGG			1																					1
	ATAACA				1																				1
	ATATAA	2	2	3	1																				8
	ATATAG	4	3	1																					8
	ATATAC			1	1																				2
	ATATTA		4	2																					6
	ATATTG			1																					1
	ATATGA	3	4	1																					8
	ATATGG		1																						1
	ATATCA	1	1																						2
	ATATCT	4																							4
	ATATCC	1																							1
	ATAGAA	3																							3
	ATAGAT	5																							5
	ATAGTA	3																							3
	ATAGTG			1																					1
	ATAGTC			1																					1
	ATAGGA	1																							1
	ATAGGT	1																							1
	ATAGGC				1																				1
	ATAGCA	4																							4
	ATACAA	3																							3
	ATACAT	2																							2
	ATACAG	1																							1
	ATACAC			1																					1
	ATACTA	4																							4
	ATACCC	1																							1
	ATTAAA	2																							2
	ATTAAT	3																							3
	ATTAAC	2																							2
	ATTATA	8		1																					9
	ATTATG	2	4																						6
	ATTAGA		2	2																					4
	ATTAGT	1																							1
	ATTAGG	1																							1
	ATTAGC			1																					1
	ATTACA	3	1	1																					5
	ATTACT			3																					3
	ATTACC	1																							1
	ATTTAA		1	4																					5
	ATTTAG		1		1																				2
	ATTTTA	10	1		4																				15
	ATTTTG	1	1	1	2																				5
	ATTTTC			3																					3
	ATTTGA	1																							1
	ATTTGT		2																						2
	ATTTGG	2																							2
	ATTTCA		4																						4
	ATTTCT		1		2																				3
	ATTGAA	1		1																					2
	ATTGAT	1	1		1																				3
	ATTGTA		1	2	1																				4
	ATTGTG	1		1																					2
	ATTGGA	1																							1
	ATTGCA	2																							2
	ATTGCT	4																							4
	ATTCAA	1																							1
	ATTCAT	2																							2
	ATTCTA	2																							2
	ATTCTG	2																							2
	ATTCTC	2																							2
	ATTCCA		2	3																					5
	ATTCCT			1																					1
	ATGAAA	3																							3
	ATGAAG	1																							1
	ATGAAC	1																							1
	ATGATA	1	2		1																				4
	ATGAGA	2																							2
	ATGACT	1																							1
	ATGTAA	2																							2
	ATGTTG	1																							1
	ATGTGA			1																					1
	ATGTGT	1																							1
	ATGTCA	1																							1
	ATGGAA			1																					1
	ATGGAG	2																							2
	ATGGTG	2																							2
	ATGGTC	1																							1
	ATGGGA	1																							1
	ATGGCA	2																							2
	ATGCTG	1																							1
	ATCAAA	2																							2
	ATCATA	2																							2
	ATCAGA	1																							1
	ATCAGT	1																							1
	ATCAGC	1																							1
	ATCACC	3																							3
	ATCTAA	1																							1
	ATCTAC	1																							1
	ATCTTA	2																							2
	ATCTTC	1																							1
	ATCTGA	1																							1
	ATCTGC	1																							1
	ATCTCA	1																							1
	ATCTCT	2																							2
	ATCTCC	3																							3
	ATCGTC	1																							1
	ATCGCA	1																							1
	ATCCTA	1																							1
	AGAAAA	11	2	1																					14
	AGAAAG		2	2																					4
	AGAAAC		1																						1
	AGAATA	1																							1
	AGAATG		1																						1
	AGAAGG	4		1																					5
	AGAACC	1																							1
	AGATGA	3	1																						4
	AGATGC	1																							1
	AGATCA			1																					1
	AGAGAA				1																				1
	AGAGAG		2																						2
	AGAGTG			1																					1
	AGAGGA		2		1																				3
	AGAGGC	1		1																					2
	AGAGCC				1																				1
	AGACAC	3																							3
	AGTAAC		1																						1
	AGTAGG	1																							1
	AGTTGA		1																						1
	AGTTGG	1																							1
	AGTTGC	1																							1
	AGTTCA			1																					1
	AGTGAA	1																							1
	AGTGGA		1																						1
	AGTGGT	1																							1
	AGTGGG	1	1																						2
	AGTGGC	1																							1
	AGTGCG	1																							1
	AGTCAC		2																						2
	AGTCTC			1																					1
	AGTCCG		1																						1
	AGGAAG	4																							4
	AGGAGA	1																							1
	AGGAGC	1																							1
	AGGTTC	1																							1
	AGGTGG	1	1																						2
	AGGGAA	1																							1
	AGGGTC		1																						1
	AGGGGG	1																							1
	AGGGCT	1																							1
	AGGCTA	1																							1
	AGGCTG	2																							2
	AGCAAC	2																							2
	AGCATG	2																							2
	AGCAGA	2																							2
	AGCAGT	1																							1
	AGCAGG	1																							1
	AGCACC	1																							1
	AGCTGA	1																							1
	AGCTGC	1																							1
	AGCTCA	1																							1
	AGCCAA	2																							2
	AGCCAC	2																							2
	AGCCTC	1																							1
	AGCCGG	1																							1
	ACAAAA	7	1		1																				9
	ACAATA	1				1																			2
	ACAATG	2																							2
	ACAAGA	2																							2
	ACAAGC	1																							1
	ACATAA	1																							1
	ACATTA	1																							1
	ACATTC	2																							2
	ACATGT	1																							1
	ACATGG	2																							2
	ACATGC	1																							1
	ACATCA	1			2	1																			4
	ACATCC			1																					1
	ACAGAG	1																							1
	ACAGCA	2																							2
	ACACAA			1																					1
	ACACAG	2																							2
	ACACTG	1																							1
	ACACGA	1																							1
	ACTAAC	1																							1
	ACTAGA	1																							1
	ACTAGC	1																							1
	ACTTCC	1																							1
	ACTGAA	1																							1
	ACTGTG	1																							1
	ACTGTC	1																							1
	ACTCAA			3																					3
	ACTCAC	2																							2
	ACTCTC	1																							1
	ACGAAA	1																							1
	ACGTGA	1																							1
	ACGGGT	1																							1
	ACGCTG	1																							1
	ACCATG		1																						1
	ACCAGC	1																							1
	ACCTTC	1		3																					4
	ACCTGC	1																							1
	ACCGGC	1																							1
	ACCCAA	1																							1
	ACCCTA	1	1	1																					3
	ACCCGA	1																							1
	TAAAAA	17	2	2																					21
	TAAAAG	1																							1
	TAAAAC	2																							2
	TAAATA	1	2	2																					5
	TAAATG	1	1	1																					3
	TAAAGA	1																							1
	TAAACC	1																							1
	TAATAG	3																							3
	TAATAC	2																							2
	TAATTA	5																							5
	TAATTC	2																							2
	TAATGG	1																							1
	TAATGC	1																							1
	TAATCA	2																							2
	TAATCC	1																							1
	TAAGAA	1																							1
	TAAGGA	3																							3
	TAACAG	1																							1
	TAACGG	2																							2
	TATAAA	4		1																					5
	TATATG	3																							3
	TATATC	1																							1
	TATAGA	1																							1
	TATACA	1		3																					4
	TATTAA	2																							2
	TATTAG				1																				1
	TATTAC	1																							1
	TATTTG	1		3																					4
	TATTTC	1																							1
	TATTGA	2																							2
	TATTGG	1																							1
	TATTGC	1																							1
	TATTCA	2																							2
	TATTCC			2																					2
	TATGTG	1																							1
	TATGCA	1																							1
	TATCAA		2																						2
	TATCTA	1																							1
	TATCCC	1	1																						2
	TAGAAC	2																							2
	TAGAGA	1																							1
	TAGTAA	2		3																					5
	TAGTAC	2																							2
	TAGGAA	1																							1
	TAGGAG			2																					2
	TAGCAA		1																						1
	TACATC	1																							1
	TACACA	1																							1
	TACTAA	1																							1
	TACTAG	1																							1
	TACCAC	1	1																						2
	TTAAAA	1	4																						5
	TTAACC	1																							1
	TTATAA	5		1																					6
	TTATTG	2	2	1																					5
	TTATTC	2																							2
	TTATGA	1																							1
	TTATCC			1																					1
	TTAGAA					1																			1
	TTAGTG	1																							1
	TTAGGA	1		1																					2
	TTAGGG	1																							1
	TTACTG	1																							1
	TTACGG	1																							1
	TTACCA	1		2																					3
	TTTAAA	1	2	2																					5
	TTTTAC	1																							1
	TTTTTG	16	2		1																				19
	TTTTTC	6	5	1																					12
	TTTTGA		1	1	1																				3
	TTTTGG			2																					2
	TTTTCA	2	1	1																					4
	TTTTCC	1		1	1																				3
	TTTGAA	2	2																						4
	TTTGTG	1		1																					2
	TTTGGA	1	1																						2
	TTTGGG			1																					1
	TTTGGC	1																							1
	TTTGCC			1																					1
	TTTCAA	1	1		1																				3
	TTTCAC	1																							1
	TTTCTC		1																						1
	TTTCGC	1																							1
	TTGAAG	2		1																					3
	TTGAAC	1	1																						2
	TTGAGA	1																							1
	TTGAGG		1																						1
	TTGTTC	1																							1
	TTGTGG	1		1	1																				3
	TTGTGC	1																							1
	TTGGAG	1	1																						2
	TTGGAC	2	1																						3
	TTGGTG	5	1	1																					7
	TTGGGG	3																							3
	TTGGGC	1																							1
	TTGGCA	1																							1
	TTGCTG		2	2																					4
	TTGCTC	1																							1
	TTGCGC			1																					1
	TTCAAC	2																							2
	TTCATC		4																						4
	TTCAGG	1																							1
	TTCAGC		2																						2
	TTCACA	1																							1
	TTCTAG	2																							2
	TTCTGA	1	1	1																					3
	TTCTGG	1																							1
	TTCTGC			1																					1
	TTCTCA	1																							1
	TTCTCC	1	1																						2
	TTCGGG		1																						1
	TTCGGC		1																						1
	TTCCAG	1																							1
	TTCCTC	1	2																						3
	TTCCCA			1																					1
	TTCCCC	1	1	1																					3
	TGAAAC	1																							1
	TGAATG			1	1																				2
	TGAAGG			2																					2
	TGAAGC		2																						2
	TGAACA			1																					1
	TGAACC			1																					1
	TGATTG			1																					1
	TGATGG		1																						1
	TGAGAG	4	1																						5
	TGAGTG	1																							1
	TGAGGA	1																							1
	TGAGGC	2																							2
	TGACAC	1																							1
	TGTAAC	1																							1
	TGTTTG	2																							2
	TGTTGA	1																							1
	TGTTGG	2																							2
	TGTTGC	1																							1
	TGTGGG	1																							1
	TGTGCA	2																							2
	TGTGCC	1																							1
	TGTCTC	2																							2
	TGGAAG	2																							2
	TGGATG	2																							2
	TGGAGG	1																							1
	TGGTTG	1																							1
	TGGTTC	2																							2
	TGGTGC	1	1	1																					3
	TGGGTG	2																							2
	TGGGTC	1																							1
	TGGGGG	3																							3
	TGGCAG	1	1	3	1																				6
	TGGCGG	1		2																					3
	TGCATG		1																						1
	TGCAGG	1																							1
	TGCAGC	1	2																						3
	TGCACC	2																							2
	TGCTAG	1																							1
	TGCTAC	2																							2
	TGCTTG	1																							1
	TGCTTC	2																							2
	TGCTGA	1																							1
	TGCTGG	1																							1
	TGCGAG		1																						1
	TGCCAC	3																							3
	TCAATC	2																							2
	TCATAG	1																							1
	TCATTC	1																							1
	TCATGA	1																							1
	TCATGG		2	1																					3
	TCATGC	1																							1
	TCAGAG		1																						1
	TCAGAC	1																							1
	TCAGCC	1																							1
	TCACAG	1																							1
	TCACAC	1																							1
	TCACTC	1																							1
	TCACCC				1																				1
	TCTATG	1																							1
	TCTATC	1																							1
	TCTTAC		1		1																				2
	TCTTTC			1	1																				2
	TCTTCG		1																						1
	TCTTCC	1	2	1																					4
	TCTGAG		1																						1
	TCTGCC	1																							1
	TCTCAG	1																							1
	TCTCAC	2																							2
	TCTCTC	2																							2
	TCTCGG	1																							1
	TCGTCC	1																							1
	TCGCCG	1																							1
	TCCAGC	1																							1
	TCCACC	1																							1
	TCCTAG	1																							1
	TCCTTC	3																							3
	TCCGAC			1																					1
	TCCCAG	1																							1
	TCCCAC	1																							1
	TCCCTC	1		1																					2
	TCCCCC	1																							1
	GAAAAG	2																							2
	GAAATG	1																							1
	GAAAGG	3																							3
	GAAAGC	1																							1
	GAAACC	1																							1
	GAATAG	1																							1
	GAATTG		2	1	1																				4
	GAATTC	1																							1
	GAATGG	2																							2
	GAATCC	2																							2
	GAAGAG		2		2																				4
	GAAGAC	1																							1
	GAAGTG	1																							1
	GAACCC	1																							1
	GATAAC		1																						1
	GATAGG	1																							1
	GATTTG	1		1																					2
	GATTGC	1																							1
	GATGAG	1																							1
	GATCAG	1																							1
	GAGAAG			1																					1
	GAGAAC	1																							1
	GAGATG	1		1																					2
	GAGACG	1																							1
	GAGTTG				1																				1
	GAGGCG	1																							1
	GAGCCC	1																							1
	GACACG		1		1																				2
	GACGAG	1																							1
	GACCGC	1																							1
	GTAAAG	1																							1
	GTAATG	1																							1
	GTATGG	1																							1
	GTACCC	1																							1
	GTTAGG	1																							1
	GTTTTG	2		1	1																				4
	GTTTCG	1																							1
	GTTGTG	1																							1
	GTTGCG	1																							1
	GTTCTG	2																							2
	GTGAAG	1																							1
	GTGATG	1	1	1																					3
	GTGAGC	1																							1
	GTGACG	1																							1
	GTGTAG	1																							1
	GTGTTG	3																							3
	GTGTGC	1																							1
	GTGTCC	1																							1
	GTGGTG			1																					1
	GTGGCG	1																							1
	GTGCAG	1																							1
	GTCATG		1	1																					2
	GTCAGG	1																							1
	GTCACG	1																							1
	GTCACC	1																							1
	GGAAAG	2																							2
	GGAAGG	1	1	1																					3
	GGAACG	1																							1
	GGATTG	1																							1
	GGATGC	1																							1
	GGAGAG	3	1	2																					6
	GGAGGG	2																							2
	GGAGGC	1																							1
	GGACAG	1																							1
	GGTATG			1																					1
	GGTTAG	1																							1
	GGTTGG	1																							1
	GGTTCG	1																							1
	GGTGGC				1																				1
	GGTCAG	1																							1
	GGGTAG					1																			1
	GGGTTG	1	1																						2
	GGGTGG	1																							1
	GGGGTG			1																					1
	GGCATG	1																							1
	GGCTTG		1																						1
	GCAATG	1																							1
	GCAGAG	1																							1
	GCAGTG	1		1																					2
	GCTATG	1																							1
	GCTTAG		1																						1
	GCTTTG	1																							1
	GCTGAG				1																				1
	GCTGTG	1																							1
	GCTCTG	1																							1
	CAAAAG	2																							2
	CAATAG	2																							2
	CAATGG	1																							1
	CAAGGG	1																							1
	CAACTG			1																					1
	CATTGG	1																							1
	CATGAG		1																						1
	CAGAAG	1																							1
	CAGGTG	1																							1
	CAGCAG	1																							1
	CACAGG	1																							1
	CACACG	1	1																						2
	CACCAG	1																							1
	CTTGGG			1																					1
	CTTCAG	1																							1
	CTGAGG		1																						1
	CTGCAG				1																				1
	CTGCGG	1																							1
	CTCCCG	1																							1
	CGACGG	1		1																					2
	CGGAGG	1																							1
	CGGTGG	3		1																					4
	CCATGG	1																							1
	Sub-total	867	239	193	79	8	1	0	0	0	0	0	0	0	0	0	0	0	0	0	0	0	0	0	1387
Others (Hepta-, Octa-, Nona-, and Deca-nucleotide)	Sub-total	184	32	15	3																				234
	Total	9785	6405	7779	2850	1538	1054	640	415	263	153	105	61	46	28	18	9	9	4	4	2	2	1	1	249492
