# Supplementary material for: Development of genomic simple sequence repeat markers for Glycyrrhiza lepidota and cross-amplification of other Glycyrrhiza species
Source: PeerJ. 2019 Aug 7;7:e7479. doi: 10.7717/peerj.7479 (PMC6689217; doi:10.7717/peerj.7479)
Supplement: Table S2 [file peerj-07-7479-s002.xlsx]

## Sheet: Table S2
Table S2. Genetic diversity statistics of 62 GL-SSR markers in 23 Glycyrrhiza spp.
Primer Data						Fragment Data
Marker	Code	Repeated motif	SSR_No	Forward Primer	Reverse Primer	NA	MAF	HO	GD	PIC
primer1	GL-gSSR-001	GT	7	GGTGTTCGTTCACCTAGGATAG	AAACCAGATTCCACAAACACTC	12	0.380952	0.285714	0.792517	0.772068
primer2	GL-gSSR-002	GT	7	CGCCATACATCATTGATAACAC	CCACTTCACAAACTCAGTTGAA	no PCR
primer3	GL-gSSR-003	AC	10	CCCTTTAGCCATTCCTTTTAAT	CCAATTTCTTGACAAACCATTT	no PCR
primer4	GL-gSSR-004	AC	9	TGCTTTCAGCATCAAGAAGATA	ACAGTTGGATCGGTTAGTTTTG	15	0.130435	0.391304	0.909263	0.902142
primer5	GL-gSSR-005	AC	6	TCTTTTGCATCAATAAAATTTCC	AGTGGATTCCTTCCTAATGAGA	8	0.340909	0.136364	0.770661	0.737822
primer6	GL-gSSR-006	AC	8	AAGATCACATGATGCAACCATA	TTACAATGGTCTACCCAGAACC	6	0.434783	0	0.676749	0.622696
primer7	GL-gSSR-007	GT	10	AGAACCCCTATTTGAGGGATAA	AACTGCATCCAGGAAAGTCTAA	6	0.304348	0.0434783	0.749527	0.707246
primer8	GL-gSSR-008	GT	7	TTCTGGGTTAAGCTTTGAAAAA	AGAAGCCACATTATGAAAGGAA	3	0.478261	0	0.540643	0.434275
primer9	GL-gSSR-009	AC	6	TTCATTTCTTTCCACCAGTACC	ATGGAGAAGAAGAGAAAGAGGG	no PCR
primer10	GL-gSSR-010	AC	7	TTCCAACCTATTTACCAAATGC	TTACGTGGGAGTAAGTTAGCGT	no PCR
primer11	GL-gSSR-011	AG	8	ATATCCATCCACAGTAGCCAAG	CTCTCTCAGTCAATCAGGTTCC	14	0.272727	0.272727	0.870868	0.860269
primer12	GL-gSSR-012	AG	6	TGAAAACGGTGTGAAAGTGATA	ATCCCTAATTCCCTACACGATT	16	0.26087	0.608696	0.862004	0.849088
primer13	GL-gSSR-013	AG	16	GAGATGATGGGAGAAGAAAGTG	ACCTCCATTTGAATTTGATTTG	15	0.142857	0.285714	0.910431	0.903546
primer14	GL-gSSR-014	CT	7	TGACTCATCAAAAGCAAATGAG	GTTACCGTCCGTAGTTCATAGC	10	0.357143	0.142857	0.80102	0.779916
primer15	GL-gSSR-015	AG	12	ATTTTCTCACACAAAAACAGGG	TTGTTCAATTTAGAGCATCACG	no PCR
primer16	GL-gSSR-016	AG	11	GAGAAGCATTGTGTGAACTGAA	TCTCCATCCAAATCCACTAATC	17	0.181818	0.409091	0.910124	0.903607
primer17	GL-gSSR-017	AG	16	GAGAGAGCTATGAAGCAAAGGA	CAAAACAAAACAAAACCCAAAT	15	0.272727	0.318182	0.850207	0.836064
primer18	GL-gSSR-018	AG	6	GAGAGTCTGAGAGAAAGAGGCA	TGTTAGGACATTACAAGCGATG	no PCR
primer19	GL-gSSR-019	AG	6	TTTAAGGGATTGACAGCAAACT	AGATGCCAATCACAACATTACA	2	0.909091	0	0.165289	0.151629
primer20	GL-gSSR-020	AG	6	GGTTGTTGTTGTGTCTAGGGTT	CAATCCGATCGAATACAATCTT	6	0.409091	0.0454545	0.740702	0.704878
primer21	GL-gSSR-021	AT	7	AATGTTTTTAAGCATTTCAGCA	GTTATTGTTTGGGTGTAGAGGC	no PCR
primer22	GL-gSSR-022	AT	9	TTCGACTCTCCCTTTCATTTTA	ACCCCCTCAGATTCTTACAAGT	13	0.295455	0.227273	0.829545	0.811147
primer23	GL-gSSR-023	AT	6	GTTAGGATGTTCACACGGTCTT	TGTGAATATAGCATTCATCCCA	9	0.35	0	0.77	0.74025
primer24	GL-gSSR-024	AT	6	CTAGCCTTCTTGCAAACTTGAT	CACATAAAACTCGGATTCCATT	no PCR
primer25	GL-gSSR-025	AT	7	ATAGGAAGAATTGGGTCTCGTT	ATGTCACTTTGCTTGTAGGGTT	no PCR
primer26	GL-gSSR-026	AT	6	ATGAAAAGCGCAAGAATGTTAT	GAATCCTCCAAATCCTGTCATA	no PCR
primer27	GL-gSSR-027	AT	6	TTTTAATGATGGCAAAAATGGT	AACTCCAGTTGAACCCCTATTT	no PCR
primer28	GL-gSSR-028	AT	10	ATCTTGCAACCACTGAGCTAAT	CAAGTTTGTTTTGTGCTTTTGA	23	0.130435	0.521739	0.935728	0.932158
primer29	GL-gSSR-029	AT	6	ATCAAACACAACGAACCATACA	GACAAAGCAGTGAAATTGGATT	no PCR
primer30	GL-gSSR-030	AT	9	TGACTCGATTGAAAAACAACTG	GCTCCATTTTATCATTTTTCGT	no PCR
primer31	GL-gSSR-031	TA	11	ATGCTACAACCTATCGCTCAGT	CCACTAGTTACATTGCGACAGA	no PCR
primer32	GL-gSSR-032	TA	6	TAAGATTTGGGTGGATTAGGTG	TTTGCGTTACTTTGGAGTCTTT	16	0.159091	0.5	0.89876	0.890311
primer33	GL-gSSR-033	TA	8	GAGTTGTAGGAGTGGTTGGTGT	GTCCACTTCATCCTCAAATGTT	14	0.195652	0.347826	0.900756	0.892902
primer34	GL-gSSR-034	TA	7	GTCATTTAGAATGAGCCCTACG	AAAAATTTATGTTGCGGATTTG	12	0.173913	0.347826	0.883743	0.87248
primer35	GL-gSSR-035	TA	8	GGGATCATAACTTGGATCGTAA	ACATGAGGAGTATTTGCTGCTT	no PCR
primer36	GL-gSSR-036	TA	6	GCTTAAGTTGGGTGGTTAGTCT	AATCATTATTCTCTAAAAGTGCAGA	no PCR
primer37	GL-gSSR-037	TA	6	ATACAACCATGGCACTTTATTG	AAAAATGATAGCATTGTGAGCA	no PCR
primer38	GL-gSSR-038	TA	6	ATATGGAAACGTACCATTTTCG	AAACAGAAGAGTGCAGGGTAAA	6	0.347826	0.173913	0.767486	0.733331
primer39	GL-gSSR-039	TA	7	AGTATGTTTTGGCACGAAGAGT	CTCATGCATCGTTCATGTATTT	no PCR
primer40	GL-gSSR-040	TA	6	ACTCCAGATCTTGTCAAAGGAA	TCTCAAAAACTCCAAAAGGAAA	no PCR
primer41	GL-gSSR-041	GA	15	GTAACAAACTGACAGGGGTCAT	CTCCACTCCACACCTTAATAGC	no PCR
primer42	GL-gSSR-042	TC	10	AGTTGCAAGAGACAGAGTGGTT	CATGAGTGATGCCATTCAATAC	11	0.204545	0.318182	0.857438	0.841654
primer43	GL-gSSR-043	TC	7	CATTTCTTTCCATCTTCCATGT	GGGATTTCTTCTTTATTTGTCGT	7	0.282609	0.130435	0.780718	0.747668
primer44	GL-gSSR-044	GA	9	AGAAGAAGAGAATGAAGGGACC	ACAAATCCCATTTTTGTCTTTG	10	0.282609	0.347826	0.848771	0.833321
primer45	GL-gSSR-045	TC	6	TCTTCCTTCGAAATTGAACACT	CTAAGCATGCACCTTTGTATCA	9	0.26087	0.26087	0.827977	0.806963
primer46	GL-gSSR-046	GA	8	GTTTTGGCTCCGATATGAATTA	CCTTGTGTAAATCAATGACGTG	no PCR
primer47	GL-gSSR-047	GA	8	AACACCCACTGCTTAGTGCTAT	CCCCTCAAATTATCAAAAATCA	11	0.413043	0.304348	0.759924	0.733408
primer48	GL-gSSR-048	GA	8	CTTTTCACGTCTCATACTTCCC	TTTGCTTCGGTTATCTGATCTT	no PCR
primer49	GL-gSSR-049	TC	7	CTTGCTCTGGAGCTTTTGTAGT	GATATGATGTTTTGCTTTGGGT	15	0.181818	0.318182	0.908058	0.901134
primer50	GL-gSSR-050	GA	6	AAAACCACTCCCTCTTATGGAT	GTGGAGATACGACAGATTGCTT	no PCR
primer51	GL-gSSR-051	TG	8	TCTGGGTCTGTTGTCTCTTTCT	CACACCCTCCCGTATAAAATAA	no PCR
primer52	GL-gSSR-052	CA	6	AAAGTGGCATGTTAAGAAGCAT	TAGCAAGCTTTCACTCTCACAA	no PCR
primer53	GL-gSSR-053	TG	7	ATAAAATTCCCCTTTCACTGGT	AAAGGCCACTGTTTGGTAACTA	no PCR
primer54	GL-gSSR-054	TG	9	CTTGTACCTAACGCTGACAACA	AGCAGACACGCTAACGATAAAT	7	0.326087	0.217391	0.750473	0.7088
primer55	GL-gSSR-055	TG	6	ATGCACTGGAGAAGTATGATCC	TGTGAAAAACTCACATGACACA	11	0.217391	0.347826	0.862949	0.848195
primer56	GL-gSSR-056	CA	6	GGTTTGTTTAACGACGATGTCT	GTGATTTTAGCCTTTCACCAAG	no PCR
primer57	GL-gSSR-057	CA	10	CATTTTGAAACATCTCGCTACA	CAAAACCCCCTTATTAATCCTC	no PCR
primer58	GL-gSSR-058	TG	9	TGTGCATAATGATCTGGTGTTT	ATAACCTGACATGCCAATTTTC	11	0.217391	0.478261	0.858223	0.842558
primer59	GL-gSSR-059	TG	6	AAAATAGGGTCCCTTTGGTTTA	AGCTTAGCATATTCCCATTTGA	4	0.478261	0.173913	0.608696	0.531402
primer60	GL-gSSR-060	TG	9	AACACCCACTGCTTAGTGCTAT	CCCCTCAAATTATCAAAAATCA	11	0.304348	0.347826	0.794896	0.768339
Mean						10.8	0.303	0.259	0.794	0.769
primer61	GL-gSSR-061	GTT	6	CGCAAGTTCACAAGTGTTAGAA	CACTGAAGAGATTCCCAATGTT	5	0.521739	0.347826	0.632325	0.577733
primer62	GL-gSSR-062	AAC	5	AAATCTTCAAGGAAGGAAAAGG	GGCCTTAATCCCAATATACTCC	8	0.347826	0.347826	0.771267	0.738127
primer63	GL-gSSR-063	AAC	7	CAAATGGTGTTTACATTGTTGC	TCCACTTCCACTATTTTTGGTC	no PCR
primer64	GL-gSSR-064	GTT	5	TTCACTCTCCATTTTCCTTTTC	GGGACGGATAGTGTATCAAAAA	no PCR
primer65	GL-gSSR-065	AAC	5	AAATATGCCACCGACATTCTAC	ATGGAATGAAAAATTAATTGCG	4	0.652174	0.26087	0.50189	0.439333
primer66	GL-gSSR-066	TGT	8	GAAATTGGAACTCTTTTGCTTG	AAGGGATCATCAATCTCTGCTA	8	0.5	0.391304	0.697543	0.669452
primer67	GL-gSSR-067	TGT	6	TGTGTACATCAAAACGGATTGT	TTGATGCTTGATGAATGATGTT	13	0.3	0.4	0.85625	0.844245
primer68	GL-gSSR-068	ACA	5	GGGTCACCATAGAGCTACACAT	GGGTAACTTAACAAGCTGTTGC	4	0.652174	0	0.502836	0.441208
primer69	GL-gSSR-069	TGT	5	CCTTTAATTGCTTCCTCATCAC	AAGAAAACGACATGGAAGAAGA	3	0.5	0.130435	0.539698	0.433758
primer70	GL-gSSR-070	TGT	7	TCTACCTTCACCTGATTTGCTT	ATAATGGTCCAACACTCCTTTG	no PCR
primer71	GL-gSSR-071	AGA	7	TTCATAAGCTCTCCCAGACACT	AGCTCTGTTGGCAGTATTGTTT	10	0.282609	0.304348	0.825142	0.803919
primer72	GL-gSSR-072	TCT	5	ACAACATTACCATCCAAACCAT	CCTCTGTATGAATTTACGGCTC	7	0.521739	0.217391	0.672968	0.641215
primer73	GL-gSSR-073	TCT	5	GTTCTGTGCTTTGAAGGATTTC	TGATGAGGAAGCAATTAAAGGT	6	0.413043	0.173913	0.708885	0.660126
primer74	GL-gSSR-074	AGA	12	AAAGTTCCATATTTCATGGCAG	GTGACGTTAGCCCTAGAAGATG	11	0.347826	0.26087	0.781664	0.75506
primer75	GL-gSSR-075	AGA	5	CAGCAATAAATTACGGTTCCTC	CAGTGTGTTTCCTCTCATTCAA	6	0.369565	0.217391	0.755198	0.71921
primer76	GL-gSSR-076	AAT	5	AGAAGCAAGCATACCACATTCT	TCAGATCCTATTGCTCCTGATT	3	0.431818	0.0454545	0.649793	0.576074
primer77	GL-gSSR-077	AAT	5	GCTTGGCTTGGATGATAAAAAT	TTGACCATAGCCATCTTTGTTT	no PCR
primer78	GL-gSSR-078	ATT	5	ATTCCCTGTTCCCTAATCTCAT	ATCGGGACAAAAATCTGAAATA	no PCR
primer79	GL-gSSR-079	ATT	5	CACGTTTGACTGACCAAGAATA	TGAAAACATCATACCAAATCCA	7	0.52381	0.142857	0.662132	0.625481
primer80	GL-gSSR-080	AAT	6	TGGAAACTCTTGGACTCTGTCT	CACAAATTTTTGAATCAGAGCA	13	0.173913	0.478261	0.89225	0.882599
primer81	GL-gSSR-081	TAT	6	AAACGCAAAGGAAAAATAATGA	TTGTCTATCTTGTTCGTGCATC	7	0.309524	0.190476	0.790249	0.760133
primer82	GL-gSSR-082	ATA	6	TAGAGTTCGAGGACGATAGCAT	GCGTATATCGGACACCCTACTA	no PCR
primer83	GL-gSSR-083	TAT	6	TGAAATAAGCGAAAGAAATGGT	TGACGTATACATGGGATGAAAA	15	0.282609	0.521739	0.84121	0.824939
primer84	GL-gSSR-084	TAT	6	ATCATTGATATTGGGGCTACTG	TTTGTTCATCCATCTCATCAAA	14	0.318182	0.454545	0.840909	0.827041
primer85	GL-gSSR-085	ATA	5	CCCTTATTGGCTGGTAAACATA	AATACACACATCTGCAAGCAAG	8	0.304348	0.173913	0.797732	0.770535
primer86	GL-gSSR-086	TTA	7	GATTTAATCACCTTCCTTTCCC	AATCCGATTATCTTTGGAACCT	9	0.272727	0.363636	0.832645	0.812727
primer87	GL-gSSR-087	TTA	6	CATCTGTGTCAATTTACGTTGG	GTTATGTTTGAGTTTGTCCGGT	no PCR
primer88	GL-gSSR-088	TAA	12	ACAATCCGTGGTGTTAATTAGG	GGGAAGGGAAGAAAAAGAAATA	18	0.108696	0.695652	0.927221	0.922452
primer89	GL-gSSR-089	TTA	5	CAAACAACATACCCAAATGACA	CGGACACACTAGTCACTGAAAA	8	0.478261	0.173913	0.697543	0.660769
primer90	GL-gSSR-090	TAA	5	TTGTTGTTCACTTGCTCATTTC	CATTGGTCCAACGAGACTATTT	8	0.521739	0	0.688091	0.665321
primer91	GL-gSSR-091	GAA	5	ATTTGATAACACTGCTGCCTCT	GTTTGTACAGAAGCCACACTCA	no PCR
primer92	GL-gSSR-092	GAA	5	CCATATCTCCACCTTTCCATAA	GAAATTACGGTTCCAATCTTCA	9	0.204545	0.272727	0.86157	0.84593
primer93	GL-gSSR-093	GAA	7	GTGAATAAAAAGAAACCCACCA	CTCACCCATCAACTTCTCTTTC	no PCR
primer94	GL-gSSR-094	TTC	7	ATTCCTCCTCTAGTGCTCTTCC	GGAAATCTGTGAATTGGTCAGT	8	0.304348	0.26087	0.821361	0.799852
primer95	GL-gSSR-095	TTC	5	AAGAACAACTCCACGAGACAGT	AGAAAGAGAAAGTGATGGGACA	13	0.217391	0.695652	0.855388	0.839416
primer96	GL-gSSR-096	TTG	5	TAGAAGCACAAGTAAGGAAGGC	GGATTCTGCTTGTATTGTCCAT	no PCR
primer97	GL-gSSR-097	TTG	5	GGGTATTAGTACCTACCAGGGG	CACACTTCCTTCTCAGTGTTCA	3	0.869565	0	0.234405	0.220082
primer98	GL-gSSR-098	CAA	12	CAGAAGCTAAGGAGGAAACTCA	ATTCGCTCATGCTTTTCTACAT	10	0.369565	0.304348	0.770321	0.741059
primer99	GL-gSSR-099	TTG	5	AGCTTTTATCCTTTGCCTTTCT	AGAAAGACATGAACATGGGAAC	8	0.391304	0.26087	0.754253	0.720599
primer100	GL-gSSR-100	CAA	5	TCAATCCTAACAGAAGCAACCT	CATCATCATCTGCATCAATTTC	3	0.478261	0	0.540643	0.434275
Mean						8.3	0.399	0.27	0.723	0.688
Total Mean						9.58065	0.349462	0.26436	0.759637	0.729902
MAF: Major allele frequency, NA: Number of alleles, GD: Genetic diversity, HO: Observed Heterozygosity, PIC: Polymorphic information content
